clinician decision support to reduce red blood cell utilization. *Transfusion* 2015; 55:1628–36

51. Johnson DJ, Scott AV, Barodka VM, Park S, Wasey JO, Ness PM, Gniadek T, Frank SM: Morbidity and mortality after high-dose transfusion. *ANESTHESIOLOGY* 2016; 124:387–95
52. Goodnough LT, Baker AS, Shah N. How I use clinical decision support to improve red blood cell utilization. *Transfusion* 2016; 56:2406–11
53. Slichter SJ, Kaufman RM, Assmann SF, McCullough J, Triulzi DJ, Strauss RG, Gernsheimer TB, Ness PM, Brecher ME, Josephson CD, Konkle BA, Woodson RD, Ortel TL, Hillyer CD, Skerrett DL, McCrae KR, Sloan SR, Uhl L, George JN, Aquino VM, Manno CS, McFarland JG, Hess JR, Leissinger C, Granger S: Dose of prophylactic platelet transfusions and prevention of hemorrhage. *N Engl J Med* 2010; 362:600–13

## ANESTHESIOLOGY REFLECTIONS FROM THE WOOD LIBRARY-MUSEUM

### Sharing “Beta-Eucain” with Schering: Albrecht Schmidt and George Merling

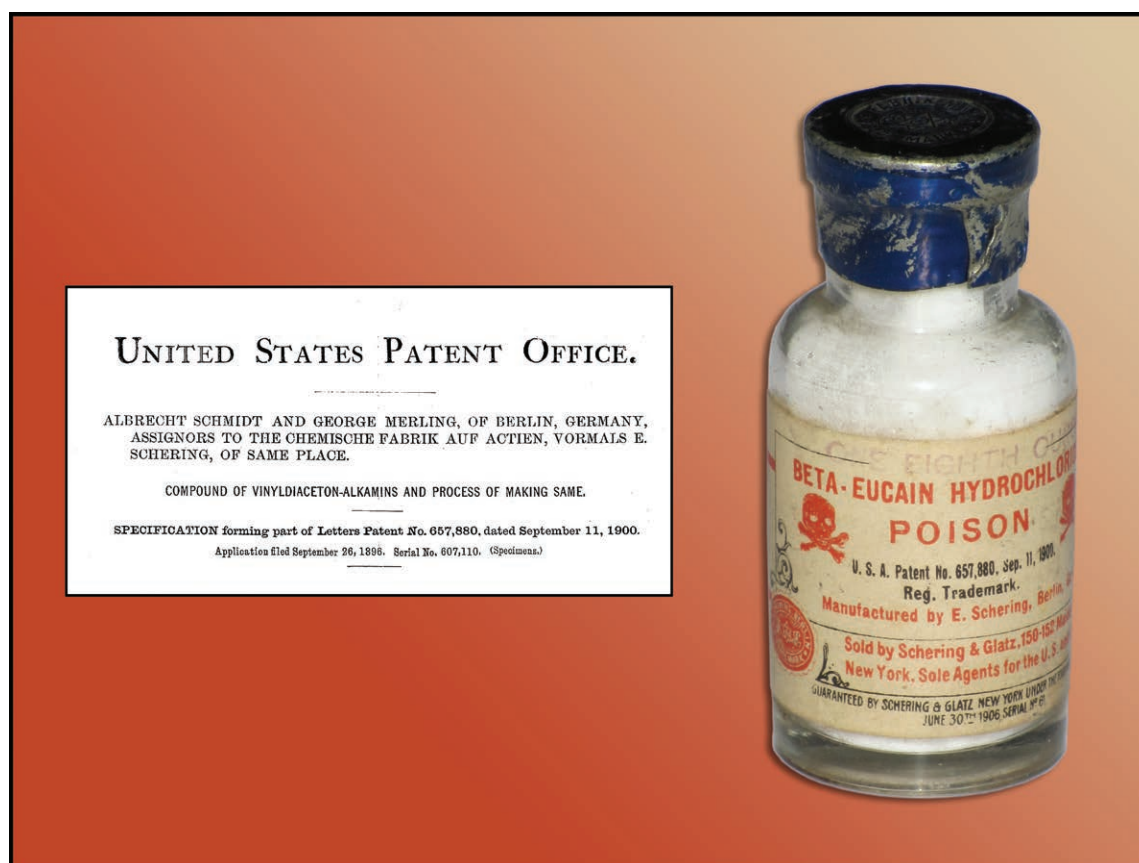

In September of 1896, two Berlin chemists, Albrecht Schmidt and George Merling, submitted sample chemical specimens of beta-eucaine, their novel local anesthetic, with an application they filed with the United States Patent Office. On September 11, 1900, U.S. Patent No. 657,880 was granted for their “Compound of vinylidiaceton-alkamins and process of making same” (left). Patent rights were assigned to a spin-off of E. Schering, a corporation founded by Ernst Christian Friedrich Schering (1824 to 1889), a German pharmaceutical chemist and industrialist. Manufactured in the chemical factory *Chemischen Fabrik auf Actien* (formerly E. Schering), this bottle of white crystalline “Beta-Eucain Hydrochloride” (right) was distributed by the New York firm of Schering & Glatz. (Copyright © the American Society of Anesthesiologists’ Wood Library-Museum of Anesthesiology.)

George S. Bause, M.D., M.P.H., *Honorary Curator and Laureate of the History of Anesthesia, Wood Library-Museum of Anesthesiology, Schaumburg, Illinois, and Clinical Associate Professor, Case Western Reserve University, Cleveland, Ohio. UJYC@aol.com.*
